# Supplementary material for: Selective dendritic localization of mRNA in Drosophila mushroom body output neurons
Source: eLife journal article supplement (doi:10.7554/elife.62770), 2021-03-16
Supplement: supp [file elife-62770-supp-v1.zip]

Archive with 5 entries (5 files):
- elife_poa_e62770_Transparent_Reporting_File.docx
- elife_poa_e62770_Figure_2_figure_supplement_1.pdf
- elife_poa_e62770_Figure_3_figure_supplement_1.pdf
- elife_poa_e62770_Figure_3_figure_supplement_2.pdf
- elife_poa_e62770_Supplementary_file_1.xlsx
