# Supplementary material for: Selective dendritic localization of mRNA in Drosophila mushroom body output neurons
Source: eLife journal article supplement (doi:10.7554/elife.62770), 2021-03-16
Supplement: supp [file elife-62770-supp-v1.zip › elife_poa_e62770_Supplementary_file_1.xlsx]

## Sheet: CaMKII
Gene	Probe number	5'-3' nucleotide sequence	Dye
CaMKII	1	GAAAAACGCGTACAGGCTGCTG	ATTO-633
CaMKII	2	CTCTTCTTTGATGTCGTAATTG	ATTO-633
CaMKII	3	ACAATTGAGAATGCTCCTTTTC	ATTO-633
CaMKII	4	GTTGACTTTTGGACACATCTTT	ATTO-633
CaMKII	5	ATTTTTGCAGCAAATTCAAAGC	ATTO-633
CaMKII	6	TCTGGCAGTTAATTTTTTTGTA	ATTO-633
CaMKII	7	TTCACGTTCCAGTTTTTGAAAG	ATTO-633
CaMKII	8	TATGTTGGGATGGTGTAACTTT	ATTO-633
CaMKII	9	AACAAGGTAGTGATAGTTCTCC	ATTO-633
CaMKII	10	CTTCTGAATAAAATTCGCGTGC	ATTO-633
CaMKII	11	GTTGAATACAATGTGATGCATC	ATTO-633
CaMKII	12	AGTGATTGACCGATTCCAATAT	ATTO-633
CaMKII	13	AATTCTCTGGTTTCAGATCTCG	ATTO-633
CaMKII	14	CCTTAGCCTTACTAGCTAATAG	ATTO-633
CaMKII	15	TAGACCAAAGTCAGCGAGTTTC	ATTO-633
CaMKII	16	ATGATCGCCTTGAACTTCAATG	ATTO-633
CaMKII	17	AATACCTCAGGAGACAGATATC	ATTO-633
CaMKII	18	GTAAAGAATAACTCCACATGCC	ATTO-633
CaMKII	19	AAGGGTGGATAACCGACAAGAA	ATTO-633
CaMKII	20	CTTTTATCTGCGAGTACAGTCG	ATTO-633
CaMKII	21	CATTCTGGAGACGGATAATCAT	ATTO-633
CaMKII	22	GATTTTTAGCTTCTGGAGTAAC	ATTO-633
CaMKII	23	GATTAACGGTTAGCATTTGATT	ATTO-633
CaMKII	24	CAGCTGCAGTTATTCGTTTATT	ATTO-633
CaMKII	25	TGACAAATCCACGGATGTTTTA	ATTO-633
CaMKII	26	GCGCATTAAATTTCTTGAGACA	ATTO-633
CaMKII	27	AACATTGTCGTAAGTATGGCTC	ATTO-633
CaMKII	28	TTCTGCTCGAAAAATTTCTGGT	ATTO-633
CaMKII	29	CTTCACCTTTTTTAGTTATCAT	ATTO-633
CaMKII	30	GATGAATCGGTTGATTCTTTGA	ATTO-633
CaMKII	31	TTTTATGTCATCGTCTTCAAGA	ATTO-633
CaMKII	32	TATTATTTCTTGTCGTCTAGCT	ATTO-633
CaMKII	33	TTCAATCAACTGCTCAGTTATC	ATTO-633
CaMKII	34	ATCAAAGTCGCCACTGTTAATT	ATTO-633
CaMKII	35	TTAGATGCGGATCACATATTTT	ATTO-633
CaMKII	36	ATCAATTCCTTCTACAAGGTTA	ATTO-633
CaMKII	37	GTTTTTACCAAGAACATTTTCA	ATTO-633
CaMKII	38	AATGGTTGTGTTTATAGCTTTG	ATTO-633
CaMKII	39	CAAGTAAGTGCACATGAGGATT	ATTO-633
CaMKII	40	CGTAAGTCTCACATAGGCAATG	ATTO-633
CaMKII	41	ATGTCCTTGCTTATCAATGTAC	ATTO-633
CaMKII	42	AACATTCTGCCATTTGTTATCG	ATTO-633
CaMKII	43	GGCAGATGCACTTCGATGAAAA	ATTO-633
CaMKII	44	AAAATCGAATGTAGTTGCTCCG	ATTO-633

## Sheet: nAChRα1 
Gene	Probe number	5'-3' nucleotide sequence	Dye
nAChRα1	1	ATACAGCTGCGAATAGCACG	ATTO-633
nAChRα1	2	GGTGGCAAAGTGTAATGCTA	ATTO-633
nAChRα1	3	GGATGAGGCGATTGTAGTTG	ATTO-633
nAChRα1	4	ATCTTGACGGTGAGACGGTC	ATTO-633
nAChRα1	5	GATTCACATCGATCAGCTGG	ATTO-633
nAChRα1	6	CCAGACATTGGTTGTCATAA	ATTO-633
nAChRα1	7	ATTTATAGTCGTTCCATTCC	ATTO-633
nAChRα1	8	ATAGTCATCCGGATTCCATT	ATTO-633
nAChRα1	9	GAGGGAACGTGCAAAGTGTC	ATTO-633
nAChRα1	10	ATATCCGGTAGCCATATATG	ATTO-633
nAChRα1	11	ATCGGCGTTGTTATAGAGCA	ATTO-633
nAChRα1	12	GCTTTTGTCATTATTGTCAC	ATTO-633
nAChRα1	13	TTTGCCCGTGTGATGAAGAA	ATTO-633
nAChRα1	14	TCTGCTCGTCGAAGGGAAAG	ATTO-633
nAChRα1	15	CAGGATCCGAACTTCATGAA	ATTO-633
nAChRα1	16	CACCATGTAACCATCGTAGG	ATTO-633
nAChRα1	17	TCTGCTTCAAGTGCCTCAAG	ATTO-633
nAChRα1	18	ACTCCACGGAGATGTAGTAG	ATTO-633
nAChRα1	19	AGCTGTAGAACTTCTCGTTC	ATTO-633
nAChRα1	20	GGTTGAACACTATGTCCAGA	ATTO-633
nAChRα1	21	TGTAGAAGAGCGTCTTCCGG	ATTO-633
nAChRα1	22	CAGGGTATGATCAGGTTGAC	ATTO-633
nAChRα1	23	CCAGAACGGACAGGAACGAG	ATTO-633
nAChRα1	24	TGATGCAGAGCGAGATCTTC	ATTO-633
nAChRα1	25	CAGCAGGAGGAAGAACACGG	ATTO-633
nAChRα1	26	TGAAGAGCAGATACTTTCCC	ATTO-633
nAChRα1	27	ACGACAGAGAGCGTGACCAG	ATTO-633
nAChRα1	28	TCACATTGAGCACGGCAATG	ATTO-633
nAChRα1	29	TGCGTGACAGGGGATCTAAA	ATTO-633
nAChRα1	30	GCAGGATCTGGATGAAGAGG	ATTO-633
nAChRα1	31	CAGGTGATAGACATCGGTGA	ATTO-633
nAChRα1	32	TGACAAACTTGTCCACATCC	ATTO-633
nAChRα1	33	CGCTGAAACGCTTCGAATCG	ATTO-633
nAChRα1	34	AAGCGGGTAGTGCTGGAATG	ATTO-633
nAChRα1	35	GCAGCCAAATCGAAGCGATG	ATTO-633
nAChRα1	36	CGAAACAGTGGGCGCTAATC	ATTO-633
nAChRα1	37	GACGGGCTGAACAGATCGTC	ATTO-633
nAChRα1	38	GACTGATGTCTCCGTTGAGG	ATTO-633
nAChRα1	39	CTTCTCGAACGTAGGACTGA	ATTO-633
nAChRα1	40	TTCGATGGTCTTCTCCATTT	ATTO-633
nAChRα1	41	CCACACTCTCAAACTTATCC	ATTO-633
nAChRα1	42	ATACCATGGCAACGTACTTC	ATTO-633
nAChRα1	43	GATCGCGAAGATCCACAGAA	ATTO-633
nAChRα1	44	CTGCAGGATAATCAGCGCTG	ATTO-633
nAChRα1	45	TATATCGATCGGCTGCGATT	ATTO-633
nAChRα1	46	ATCTTGAGCAGCTCGAACTT	ATTO-633

## Sheet: YFP
Gene	Probe number	5'-3' nucleotide sequence	Dye
YFP	1	CGGTGAACAGCTCCTCGC	Quasar-670
YFP	2	GACCAGGATGGGCACCAC	Quasar-670
YFP	3	GTTTACGTCGCCGTCCAG	Quasar-670
YFP	4	CCGGACACGCTGAACTTG	Quasar-670
YFP	5	TTGCCGTAGGTGGCATCG	Quasar-670
YFP	6	CCGGTGGTGCAGATGAAC	Quasar-670
YFP	7	AGGGTGGTCACGAGGGTG	Quasar-670
YFP	8	AAGCACTGCACGCCGTAG	Quasar-670
YFP	9	ATGTGGTCGGGGTAGCGG	Quasar-670
YFP	10	TGAAGAAGTCGTGCTGCT	Quasar-670
YFP	11	ACGTAGCCTTCGGGCATG	Quasar-670
YFP	12	AGAAGATGGTGCGCTCCT	Quasar-670
YFP	13	TCTTGTAGTTGCCGTCGT	Quasar-670
YFP	14	TCGAACTTCACCTCGGCG	Quasar-670
YFP	15	TCGATGCGGTTCACCAGG	Quasar-670
YFP	16	TGAAGTCGATGCCCTTCA	Quasar-670
YFP	17	CAGGATGTTGCCGTCCTC	Quasar-670
YFP	18	TTGTACTCCAGCTTGTGC	Quasar-670
YFP	19	AGACGTTGTGGCTGTTGT	Quasar-670
YFP	20	CTGCTTGTCGGCCATGAT	Quasar-670
YFP	21	TTCACCTTGATGCCGTTC	Quasar-670
YFP	22	CGATGTTGTGGCGGATCT	Quasar-670
YFP	23	TAGTGGTCGGCGAGCTGC	Quasar-670
YFP	24	CGATGGGGGTGTTCTGCT	Quasar-670
YFP	25	TTGTCGGGCAGCAGCACG	Quasar-670
YFP	26	GACTGGGTGCTCAGGTAG	Quasar-670
YFP	27	GTTGGGGTCTTTGCTCAG	Quasar-670
YFP	28	ACCATGTGATCGCGCTTC	Quasar-670
YFP	29	CGGTCACGAACTCCAGCA	Quasar-670
YFP	30	TCCATGCCGAGAGTGATC	Quasar-670

## Sheet: nAChRα5
Gene	Probe number	5'-3' nucleotide sequence	Dye
nAChRα5	1	CAACTTCAGTCAGTTTCAGTTG	ATTO-633
nAChRα5	2	ACAGTCTTATGTTTGTTGGTTG	ATTO-633
nAChRα5	3	TTCTTGATATCTGTTTCGTTTG	ATTO-633
nAChRα5	4	TTTTGAAGGGAGGCATGCTAAG	ATTO-633
nAChRα5	5	AATACTGAACTCATTGTCGCTG	ATTO-633
nAChRα5	6	TACTCTATCATGTCTCGATATC	ATTO-633
nAChRα5	7	GCAAAGCTGCCTAAATAGGAAA	ATTO-633
nAChRα5	8	GAGTGTTTATTAAGTCCGTTTA	ATTO-633
nAChRα5	9	CTAGGCAAACTTTAGCAGATAA	ATTO-633
nAChRα5	10	AACAGTCTCTTTTCATGATATC	ATTO-633
nAChRα5	11	TTATAGGGATCCAAAAGATCGT	ATTO-633
nAChRα5	12	ATTCATTGAGAACGGGACGTTC	ATTO-633
nAChRα5	13	ACCAAAGCTTAATTGTAACGGG	ATTO-633
nAChRα5	14	CCACATCGATAATTTGCATTAA	ATTO-633
nAChRα5	15	TGACTAGCAATTGATTTTTCTC	ATTO-633
nAChRα5	16	ACTCCAGTTTTAACCACACATT	ATTO-633
nAChRα5	17	AACGTATAGACACGAGCCGTTG	ATTO-633
nAChRα5	18	CTTGCACGTCGACTTGAAGATC	ATTO-633
nAChRα5	19	TCTTGTAATTGTAAATCCAGCT	ATTO-633
nAChRα5	20	TTGAGCACGTAACTGCTGATAT	ATTO-633
nAChRα5	21	AGCAGTTGTAATAGATTTCGTT	ATTO-633
nAChRα5	22	AAGGTGATGTCTATATAGGGTT	ATTO-633
nAChRα5	23	AGAAATAGTACAGTGTTCGTCG	ATTO-633
nAChRα5	24	GCAATCAGTACACAAGGTATGA	ATTO-633
nAChRα5	25	AGTGATAATTTTTCACCCGAAT	ATTO-633
nAChRα5	26	AGCGAGAGCAAGATGGTAACAC	ATTO-633
nAChRα5	27	GGCAACCATATTCAGAAACACG	ATTO-633
nAChRα5	28	TGAAATATGTACCCAGCAATGG	ATTO-633
nAChRα5	29	AAGCTACCATAAACATTATGCA	ATTO-633
nAChRα5	30	TTAAAATCGTTGACACAACGGA	ATTO-633
nAChRα5	31	GTATCAGCATTTCGATGATGAT	ATTO-633
nAChRα5	32	ACAAAAACACGATGCGTATCCA	ATTO-633
nAChRα5	33	CGACTCATTCGCAATATCCATG	ATTO-633
nAChRα5	34	AAGTCATCATCGATGTCTAGTA	ATTO-633
nAChRα5	35	CCATAAACCGTGCGATAGAAAG	ATTO-633
nAChRα5	36	TTTGATGCACGTATGATGGGTG	ATTO-633
nAChRα5	37	ACCTAATTCATATTCAGTTGAT	ATTO-633
nAChRα5	38	TCAGTTATAAAGCGAATTTCCT	ATTO-633
nAChRα5	39	TCATTGCACTCGTCATCTTTAC	ATTO-633
nAChRα5	40	AATATGATAAGGCACAGTCTGT	ATTO-633
nAChRα5	41	ACAGCTATTGTGGCTAATATTG	ATTO-633
nAChRα5	42	CGAGACAATAATATGTGGTGCT	ATTO-633

## Sheet: nAChRα6
Gene	Probe number	5'-3' nucleotide sequence	Dye
nAChRα6	1	AACAGGACAAACAGCGACAGC	ATTO-633
nAChRα6	2	TTTCTTTAATTATCGCCAGAA	ATTO-633
nAChRα6	3	CTTTTCATGAGGTCCTTGACA	ATTO-633
nAChRα6	4	TATTGTAGGTGGACAGCAGAT	ATTO-633
nAChRα6	5	CAGCGTCAGTCCGAACTTAAC	ATTO-633
nAChRα6	6	TTCATCCACGTCGATGATCTG	ATTO-633
nAChRα6	7	TTTGTGGTCAGAATCTGATTC	ATTO-633
nAChRα6	8	TCTCGTCCAAATTTAACCACG	ATTO-633
nAChRα6	9	ATTCGTTATGAGAAGCTGATT	ATTO-633
nAChRα6	10	TTCCACTCCAACGAAAGCCAA	ATTO-633
nAChRα6	11	TCATTCCAGCGCAGATTGTAG	ATTO-633
nAChRα6	12	CGTGATTCGTAGATCCTTGAC	ATTO-633
nAChRα6	13	CTGTTGTACATGAGCACGTCG	ATTO-633
nAChRα6	14	CACAATGTTGGTGTGATACGT	ATTO-633
nAChRα6	15	AGACAACTGCCGTTATGTTTG	ATTO-633
nAChRα6	16	ATGTGCTCTTGAAGATACCAG	ATTO-633
nAChRα6	17	GAACCACGTGATGTCTATCTT	ATTO-633
nAChRα6	18	TCGCAATGTTGGTCATCAAAT	ATTO-633
nAChRα6	19	AAGTCCAACTACCGAATTTCA	ATTO-633
nAChRα6	20	CAAATCCAACTGATTTCCATC	ATTO-633
nAChRα6	21	CCTCCATCTTCGGAATTCAAA	ATTO-633
nAChRα6	22	CGCCATTTGTTATGAAATCGG	ATTO-633
nAChRα6	23	CGTAGACTATCGTATTCTTCT	ATTO-633
nAChRα6	24	GGTGATATCGACATATGGTTC	ATTO-633
nAChRα6	25	ACGGCGACGAATTTGTATAGT	ATTO-633
nAChRα6	26	ATTAGCACACATGGCACAATT	ATTO-633
nAChRα6	27	GAATCCGGCGGCAATGTGAAG	ATTO-633
nAChRα6	28	AATTGTAACTCCCAGCGTCAG	ATTO-633
nAChRα6	29	AGAAACACTGTGAGCGATAGA	ATTO-633
nAChRα6	30	GCAATGTCTCAGCTACAAGGT	ATTO-633
nAChRα6	31	AGGGGATTGCATCAGATACTT	ATTO-633
nAChRα6	32	GCAATTGAAGTAGGTGCCTAA	ATTO-633
nAChRα6	33	GACGAGGCGACCATGAACATG	ATTO-633
nAChRα6	34	TAGTTGAGCACCACTACTGTC	ATTO-633
nAChRα6	35	AGCCATTGTAGGAAAACGGAC	ATTO-633
nAChRα6	36	TTGTTTTGCGTGTAATCTTGC	ATTO-633
nAChRα6	37	CCTTCATGCGATTGCTTAATA	ATTO-633
nAChRα6	38	TCGTCGATGTCGAGGACATTG	ATTO-633
nAChRα6	39	CAGATATTGTGTGCCGGAAGT	ATTO-633
nAChRα6	40	GAAGATCTTTGTGATTGCAGC	ATTO-633
nAChRα6	41	CGCGCCGTAATAAATTGCAAT	ATTO-633
nAChRα6	42	AACTTCCAATCGCCGATCAAT	ATTO-633
nAChRα6	43	AAATCTATCCACAACCATTGC	ATTO-633
nAChRα6	44	CCGTTGCAATAATCGTGAAGA	ATTO-633
nAChRα6	45	TATTGCACGATTATGTGCGGA	ATTO-633
