# Supplementary figures and images for: Selective dendritic localization of mRNA in Drosophila mushroom body output neurons
Source: eLife journal article supplement (doi:10.7554/elife.62770), 2021-03-16

Figure 2 – figure supplement 1.

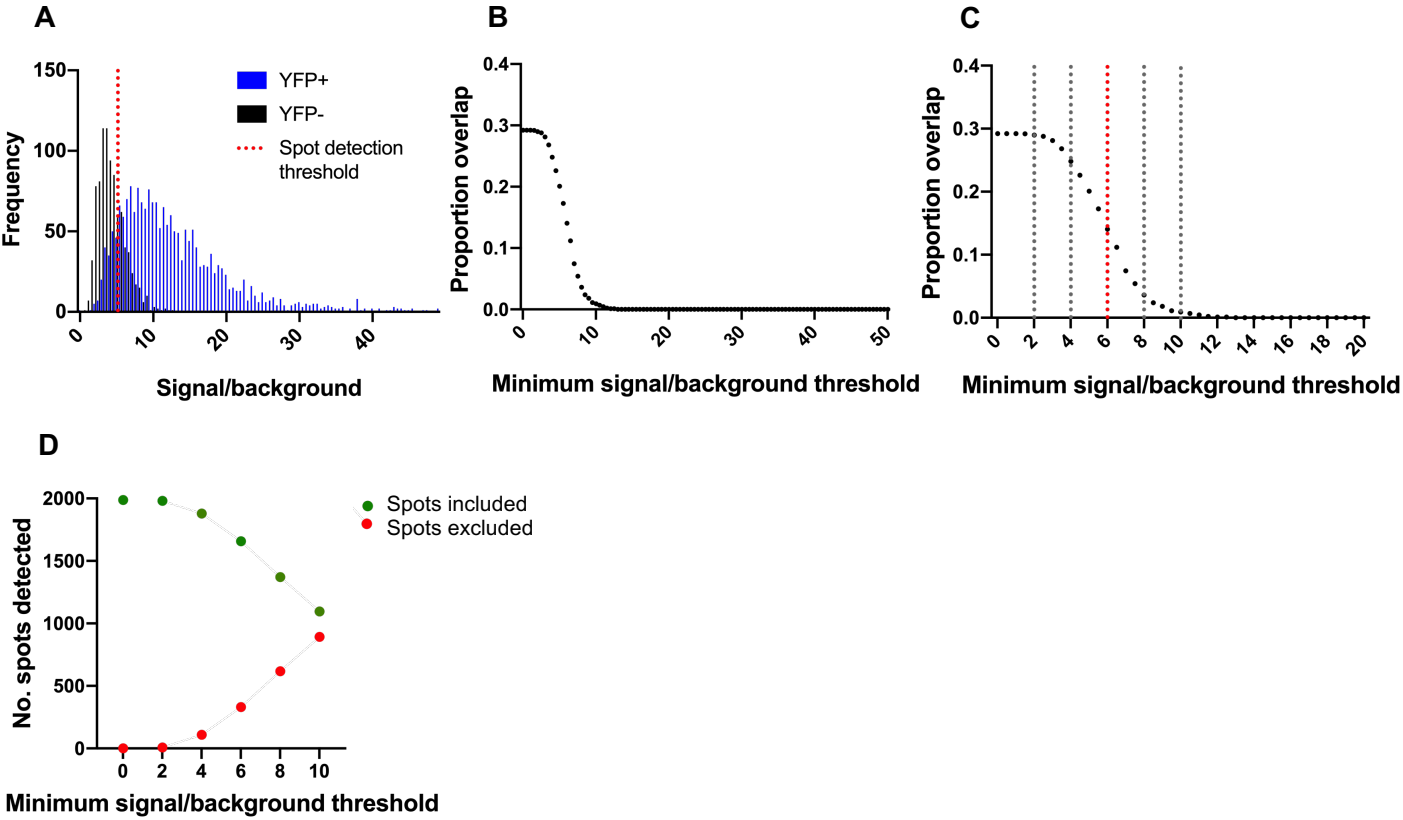

Supplement: supp [file elife-62770-supp-v1.zip › elife_poa_e62770_Figure_2_figure_supplement_1.pdf]

Figure 3 – figure supplement 1.

Endogenous *CaMKII* smFISH probes

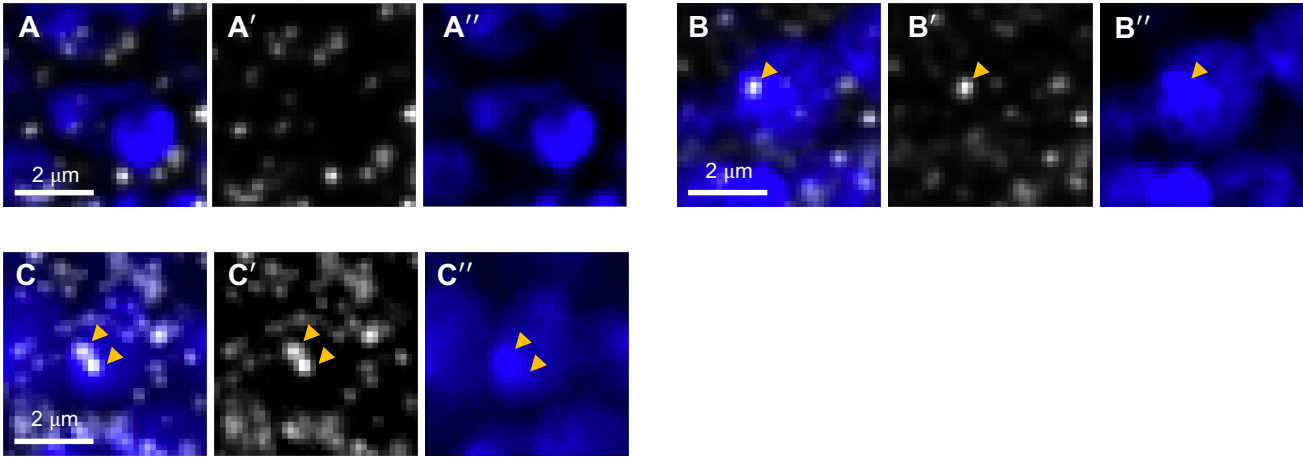

*YFP* smFISH probes

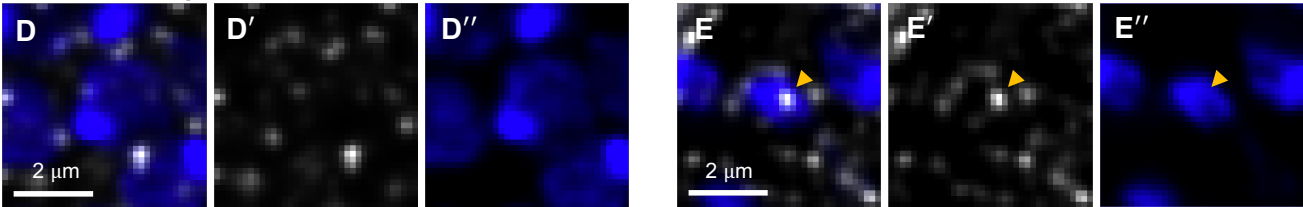

Supplement: supp [file elife-62770-supp-v1.zip › elife_poa_e62770_Figure_3_figure_supplement_1.pdf]

Figure 3 – supplemental figure 2.

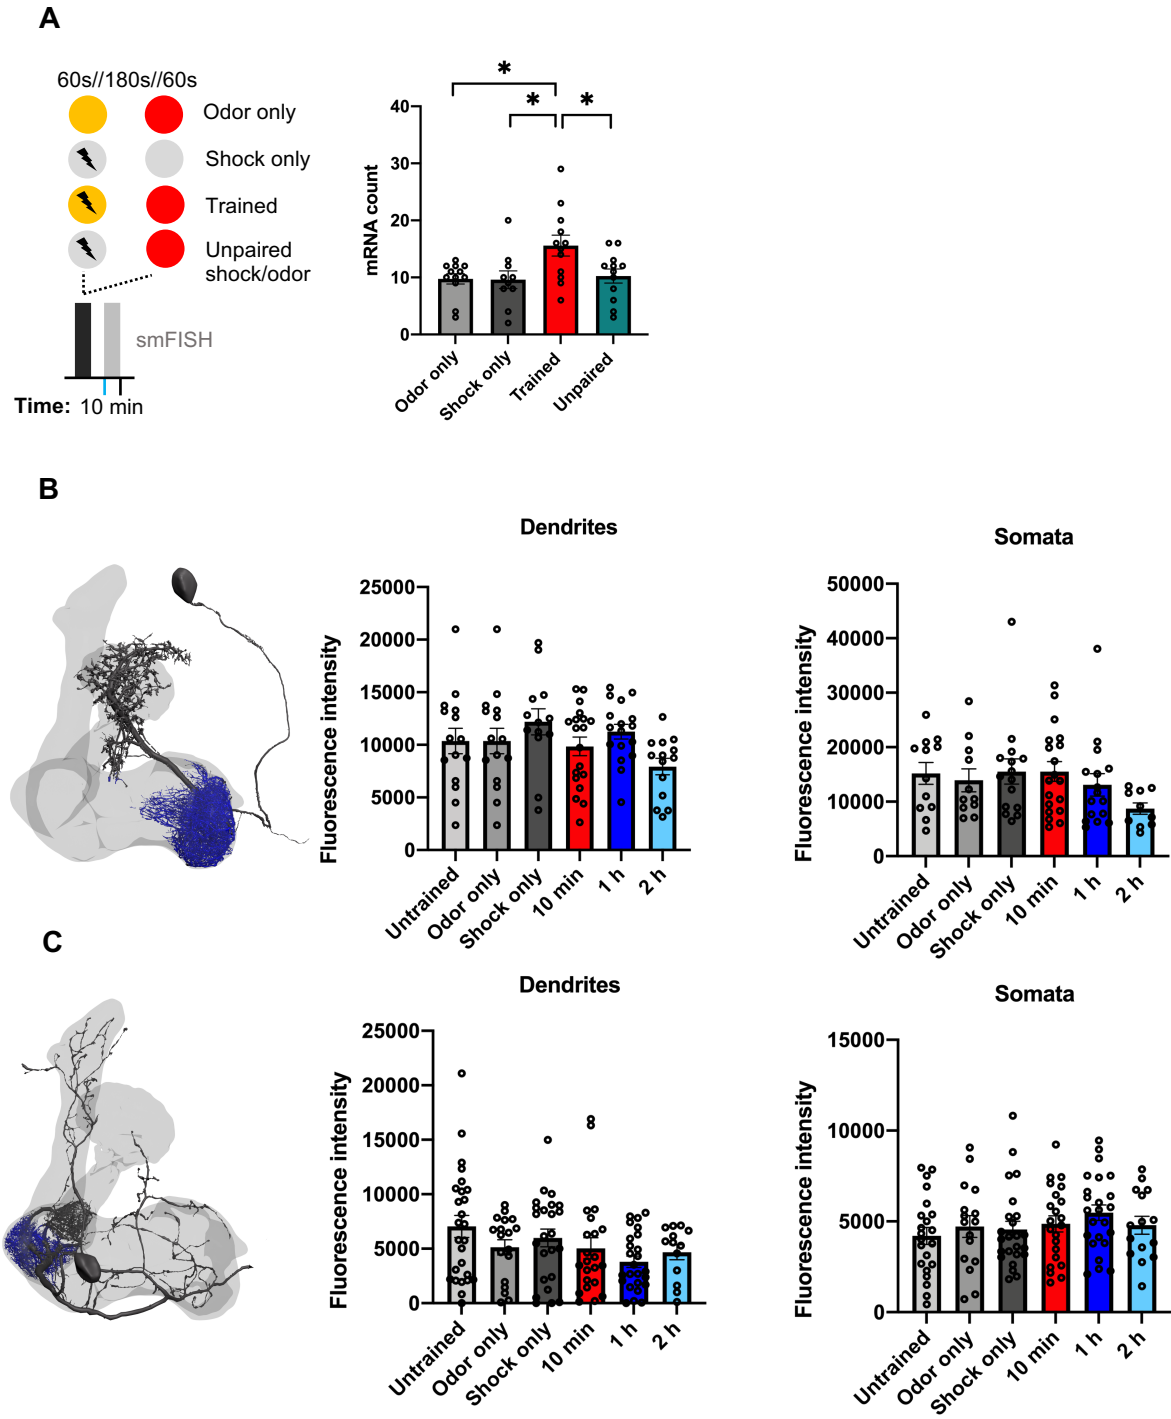

Supplement: supp [file elife-62770-supp-v1.zip › elife_poa_e62770_Figure_3_figure_supplement_2.pdf]
